# Supplementary material for: Thermal cycling protects SH-SY5Y cells against hydrogen peroxide and β-amyloid-induced cell injury through stress response mechanisms involving Akt pathway
Source: PubMed Central journal article supplement (PMC7529293; doi:10.1371/journal.pone.0240022), 2020-10-01
Supplement: pone.0240022.s001.pdf [file pone.0240022.s001.pdf]

### Fig 2A

| H2O2 (uM)                    | 0        | 150      | 200      | 250      | 300      | 350      | 400      | 450      |
|------------------------------|----------|----------|----------|----------|----------|----------|----------|----------|
|                              | 102.1739 | 87.6087  | 81.52174 | 83.91304 | 58.69565 | 63.04348 | 65.21739 | 52.17391 |
| Normalized Viability average | 100      | 87.17391 | 85.86957 | 82.6087  | 76.08696 | 73.91304 | 56.52174 | 52.17391 |
| H2O2 (uM)                    | 500      |          |          |          |          |          |          |          |
|                              | 43.47826 |          |          |          |          |          |          |          |
| Normalized Viability average | 40       |          |          |          |          |          |          |          |
|                              | 37.3913  |          |          |          |          |          |          |          |
|                              | 40.28985 |          |          |          |          |          |          |          |

### Fig 2B

|                              | C        |          | 41.5 TC  |          | 41.5 HT  |            |
|------------------------------|----------|----------|----------|----------|----------|------------|
| H2O2 (uM)                    | 0        | 450 uM   | 0        | 450 uM   | 0        | 450 uM     |
|                              | 97.84367 | 57.42049 | 102.965  | 74.89757 | 99.46092 | 62.27224   |
| Normalized Viability average | 101.0782 | 54.71698 | 101.3477 | 67.96765 | 100.8598 | 65.15903   |
|                              | 101.0782 | 49.25606 | 99.31267 | 62.93261 | 95.01617 | 58.31536   |
|                              | 100      | 53.79784 | 101.2084 | 68.59928 | 98.44564 | 61.9155433 |

### Fig 2C

|                              | C        |          | 42.5 TC x 8 |          | 42.5 HT 2hr |          | 42.5 TC x 12 |          |
|------------------------------|----------|----------|-------------|----------|-------------|----------|--------------|----------|
| H2O2 (uM)                    | 0        | 450 uM   | 0           | 450 uM   | 0           | 450 uM   | 0            | 450 uM   |
|                              | 97.84367 | 57.42049 | 99.57746    | 79.5493  | 101.9718    | 62.67606 | 92.01481     | 78.21259 |
| Normalized Viability average | 101.0782 | 54.71698 | 102.6761    | 82.43662 | 95.38028    | 69.4169  | 94.49075     | 81.54416 |
|                              | 101.0782 | 49.25606 | 100.2817    | 84.32394 | 101.1268    | 63.85915 | 92.96668     | 74.40508 |
|                              | 100      | 53.79784 | 100.8451    | 82.10329 | 99.49296    | 65.31737 | 93.1574133   | 78.05394 |
|                              |          |          | 42.5 HT 3hr |          |             |          |              |          |
| H2O2 (uM)                    | 0        | 450 uM   |             |          |             |          |              |          |
|                              | 75.61185 | 42.35854 |             |          |             |          |              |          |
| Normalized Viability average | 72.13591 | 42.04125 |             |          |             |          |              |          |
|                              | 73.4532  | 40.29614 |             |          |             |          |              |          |
|                              | 73.73365 | 41.56531 |             |          |             |          |              |          |

### Fig 2D

|                              | C       | H2O2   | 1min | 3min   |
|------------------------------|---------|--------|------|--------|
|                              | 110.5   | 59.6   | 62.8 | 58.2   |
|                              | 98.2    | 63.5   | 58.1 | 64.5   |
| Normalized Viability average | 99.3    | 59.9   | 57.8 | 63.7   |
|                              | 92.1    | 54.9   | 58.5 | 62.1   |
|                              | 100.025 | 59.475 | 59.3 | 62.125 |

### Fig 2E

|                              | C       |         | 42.5 HT 2hr |         | 42.5 TC x8 |         |
|------------------------------|---------|---------|-------------|---------|------------|---------|
| H2O2 (uM)                    | 0       | 450 uM  | 0           | 450 uM  | 0          | 450 uM  |
|                              | 106.821 | 214.286 | 112.943     | 221.214 | 110.849    | 169.012 |
| Normalized Viability average | 92.803  | 218.153 | 101.987     | 218.475 | 103.598    | 142.75  |

|           |         |         |         |          |          |         |
|-----------|---------|---------|---------|----------|----------|---------|
| Viability | 100.376 | 217.508 | 103.598 | 188.507  | 96.831   | 144.844 |
| average   | 100     | 216.649 | 106.176 | 209.3987 | 103.7593 | 152.202 |

Fig 3A

|            |          |          |          |
|------------|----------|----------|----------|
| Abeta (uM) | 0        | 25       | 50       |
|            | 106.5903 | 63.03725 | 57.30659 |
| Normalized | 94.26934 | 61.60458 | 51.86246 |
| Viability  | 99.1404  | 60.45845 | 54.44126 |
| average    | 100      | 61.70009 | 54.53677 |

Fig 3B

|            |          |          |          |           |          |            |
|------------|----------|----------|----------|-----------|----------|------------|
|            | C        | Abeta    | TC (pre) | TC (post) | HT (pre) | HT (post)  |
|            | 100.274  | 60.54314 | 65.47092 | 77.52475  | 59.29393 | 53.40594   |
| Normalized | 103.0137 | 55.12871 | 56.18326 | 82.49363  | 52.27496 | 59.06647   |
| Viability  | 96.71233 | 58.32815 | 61.34478 | 84.21641  | 56.25922 | 55.62094   |
| average    | 100      | 58       | 60.99965 | 81.4116   | 55.9427  | 56.0311167 |

Fig 4

|               |     |          |          |          |
|---------------|-----|----------|----------|----------|
|               | C   | H2O2     | TC+H2O2  | HT+H2O2  |
| ROS level     | 100 | 167.9845 | 129.4574 | 162.5323 |
| normalized to | 100 | 149.2647 | 121.0784 | 163.5784 |
| control       | 100 | 155.2339 | 129.176  | 151.0022 |

Fig 5

|            |      |      |         |         |
|------------|------|------|---------|---------|
|            | C    | H2O2 | TC+H2O2 | HT+H2O2 |
| Cells with | 33.5 | 50.4 | 39      | 42      |
| decreased  | 35   | 51.9 | 35      | 45.9    |
| MMP (%)    | 39   | 52   | 34      | 41      |
|            | 33.3 | 49.4 | 37.2    | 44.2    |

Fig 9A

|            |          |          |          |          |          |            |            |
|------------|----------|----------|----------|----------|----------|------------|------------|
|            | C        | H2O2     | 12LY+H   | 25LY+H   | TC+H     | TC+H+12LY  | TC+H+25LY  |
|            | 99.14984 | 47.50266 | 46.54623 | 46.54623 | 88.94793 | 62.16791   | 51.64718   |
| Normalized | 96.28055 | 66.95005 | 42.08289 | 38.57598 | 88.31031 | 68.86291   | 51.32837   |
| Viability  | 104.5696 | 61.53029 | 52.60361 | 53.87885 | 79.70244 | 67.58767   | 49.09671   |
| average    | 100      | 58.661   | 47.07758 | 46.33369 | 85.65356 | 66.2061633 | 50.6907533 |
