# Supplementary material for: Thermal cycling protects SH-SY5Y cells against hydrogen peroxide and β-amyloid-induced cell injury through stress response mechanisms involving Akt pathway
Source: PubMed Central journal article supplement (PMC7529293; doi:10.1371/journal.pone.0240022), 2020-10-01

Fig 6

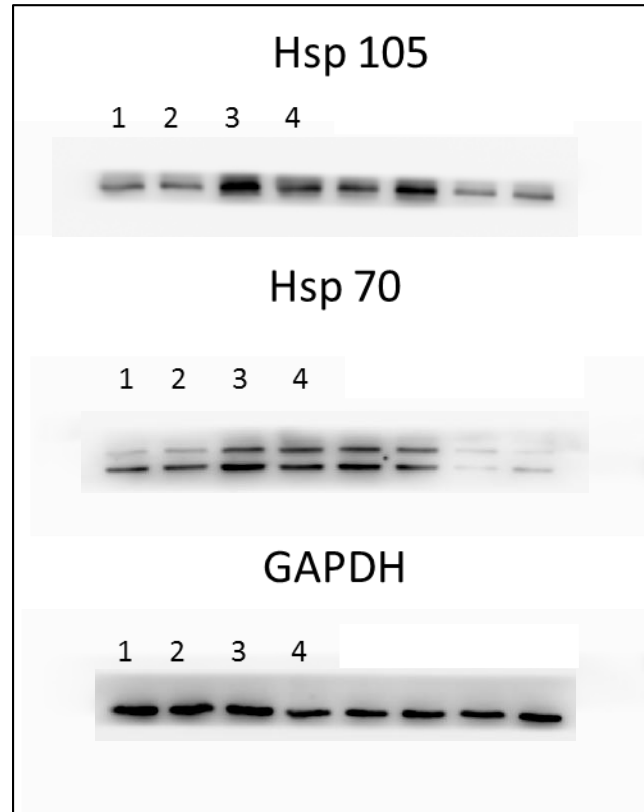

1: C

2: H<sub>2</sub>O<sub>2</sub>

3: TC+H<sub>2</sub>O<sub>2</sub>

4: HT+H<sub>2</sub>O<sub>2</sub>

Fig 7

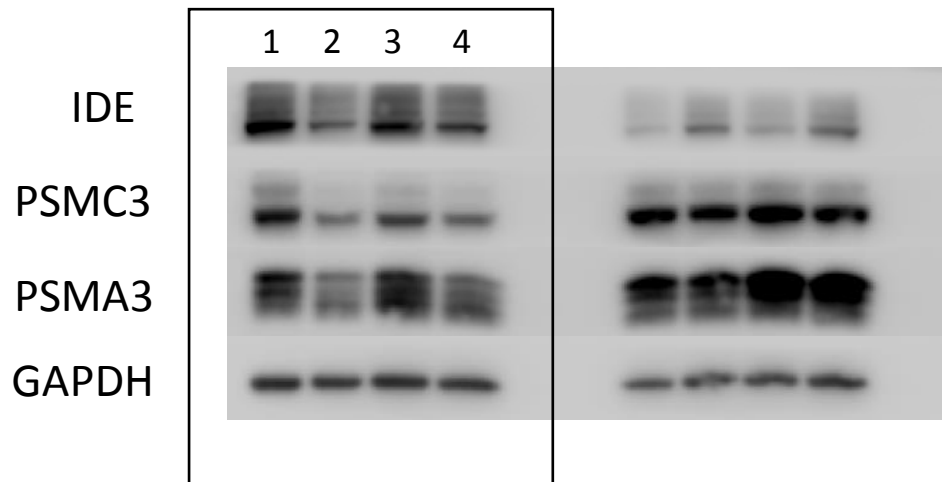

1: C

2: H<sub>2</sub>O<sub>2</sub>

3: TC+H<sub>2</sub>O<sub>2</sub>

4: HT+H<sub>2</sub>O<sub>2</sub>

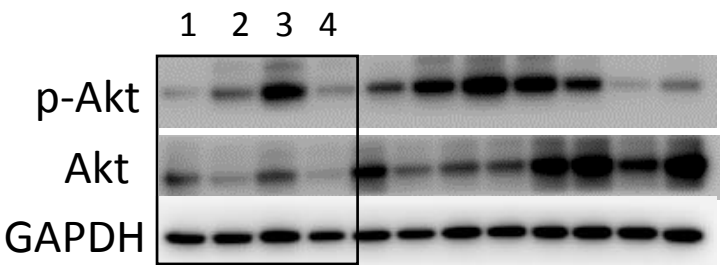

1: C  
 2: H<sub>2</sub>O<sub>2</sub>  
 3: TC+H<sub>2</sub>O<sub>2</sub>  
 4: HT+H<sub>2</sub>O<sub>2</sub>

Fig 8

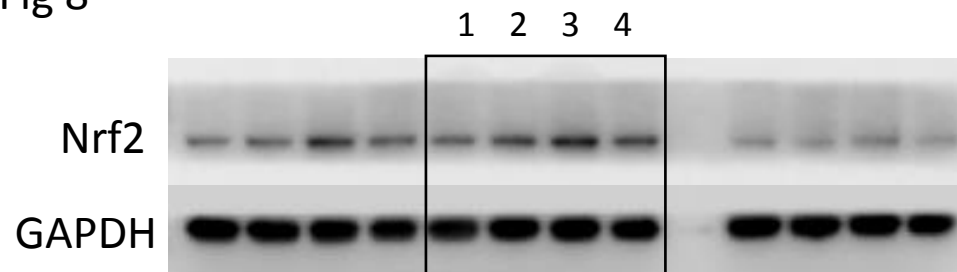

1: C  
 2: H<sub>2</sub>O<sub>2</sub>  
 3: TC+H<sub>2</sub>O<sub>2</sub>  
 4: HT+H<sub>2</sub>O<sub>2</sub>

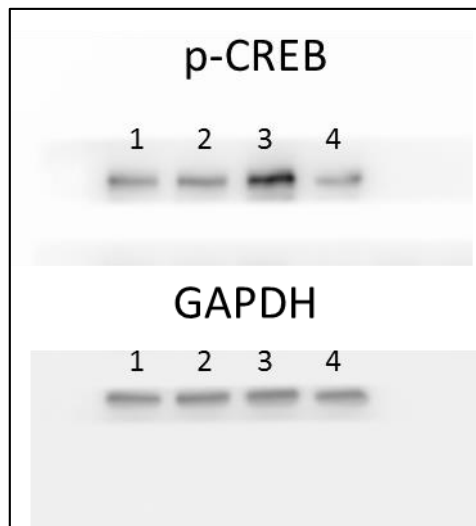

1: C  
 2: H<sub>2</sub>O<sub>2</sub>  
 3: TC+H<sub>2</sub>O<sub>2</sub>  
 4: HT+H<sub>2</sub>O<sub>2</sub>

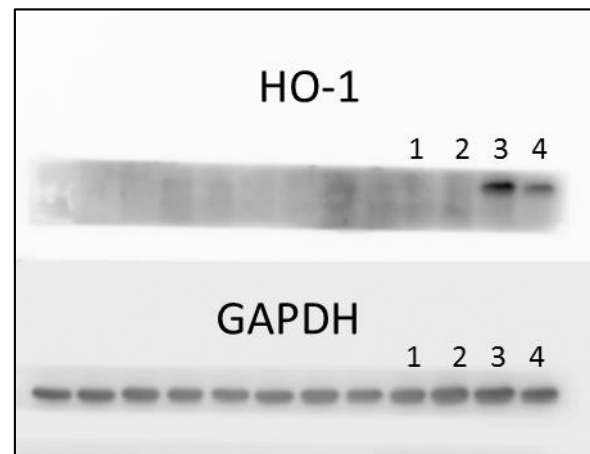

1: C  
 2: H<sub>2</sub>O<sub>2</sub>  
 3: TC+H<sub>2</sub>O<sub>2</sub>  
 4: HT+H<sub>2</sub>O<sub>2</sub>

Fig 9

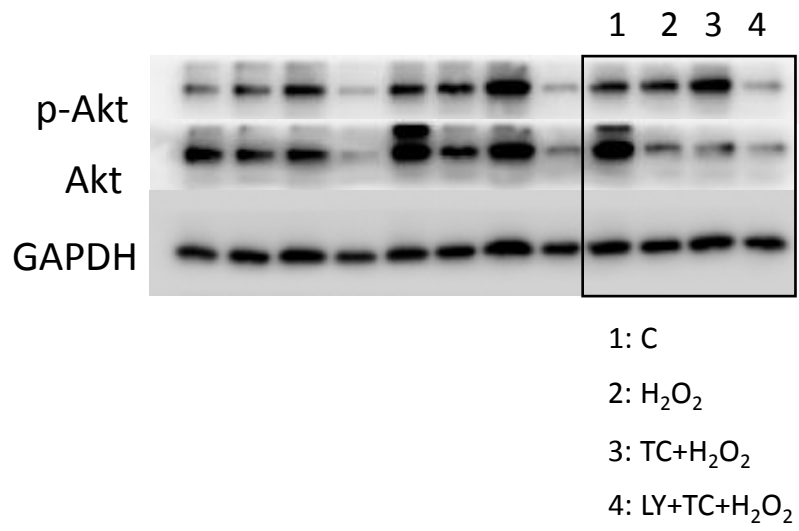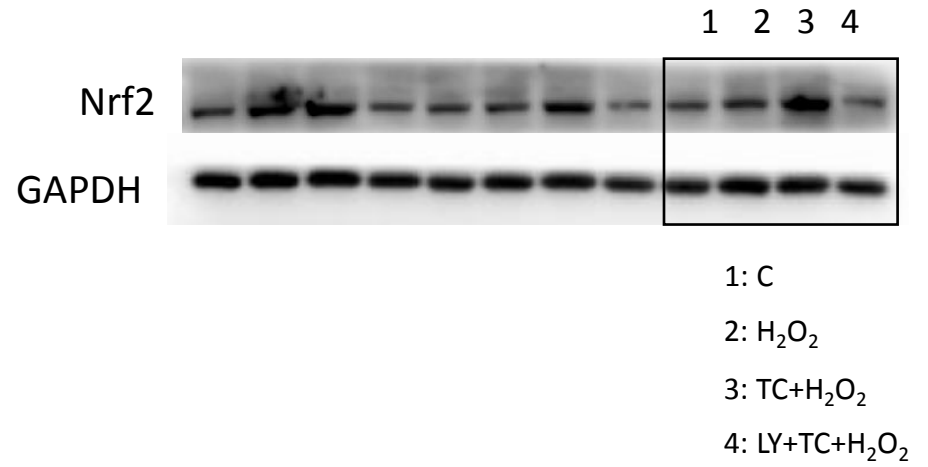

Supplement: pone.0240022.s002.pdf [file pone.0240022.s002.pdf]
